# Supplementary material
Source: PubMed Central journal article supplement (PMC4428280)
Supplement: NIHMS677773-supplement-supplement.pdf [file NIHMS677773-supplement-supplement.pdf]

**Figure S1.** Post-LAS Conditional Survival by Recipient Diagnosis and Age  
Kaplan-Meier survival curves conditioned on survival to one year post transplantation for the post-LAS cohort. Panel A – survival by recipient diagnosis: group A (obstructive) (red line); group B (pulmonary vascular) (blue line); group C (cystic fibrosis or immunodeficiency) (green line) ; group D (restrictive). Panel B – survival by age  $\geq 50$  years (blue line) and  $< 50$  years (red line).

Figure S1.

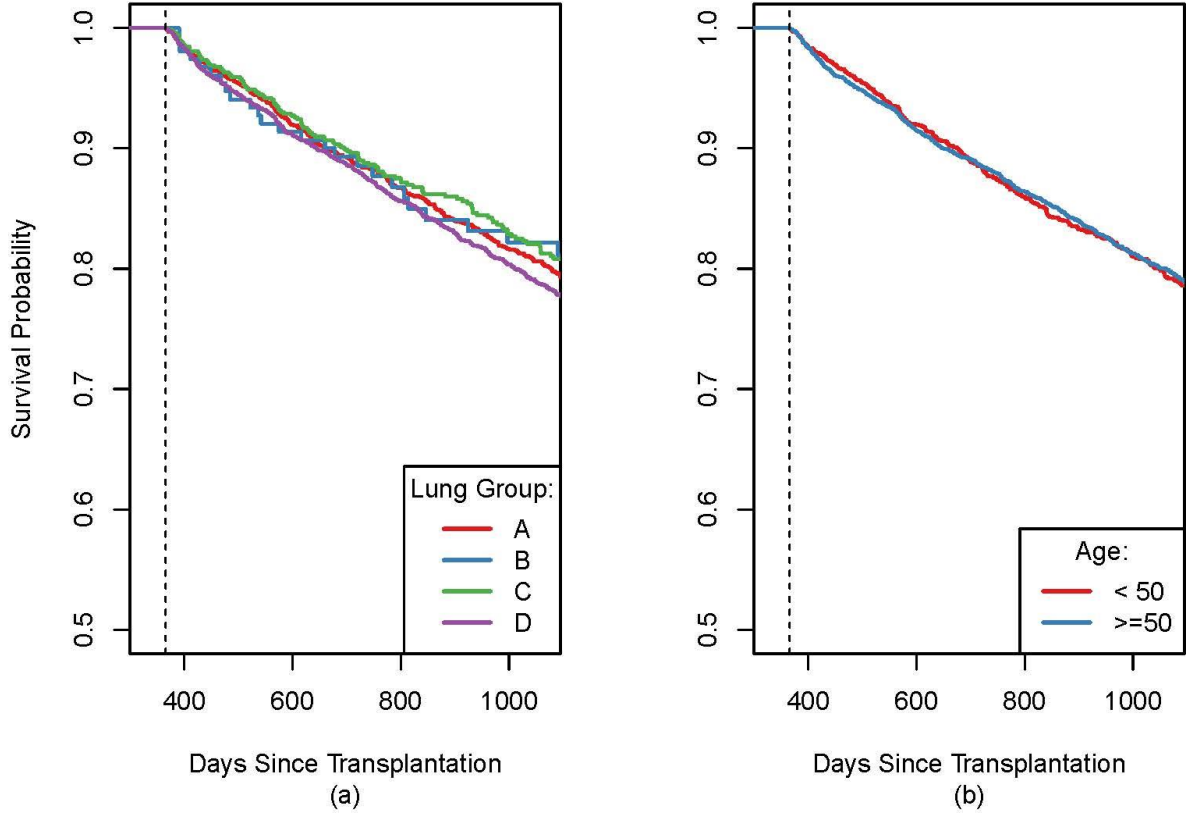

**Table S1.** Weekly mortality rates per 10,000 patients around the one-year threshold by temporal cohort

| <b>Week</b> | <b>Historic Control<br/>1995 – 2000</b> | <b>Pre-LAS Cohort<br/>2001 – 4/2005</b> | <b>Post- LAS Cohort<br/>5/2005 – 11/2011</b> |
|-------------|-----------------------------------------|-----------------------------------------|----------------------------------------------|
| 40          | 2.95                                    | 5.18                                    | 3.10                                         |
| 41          | 1.84                                    | 3.34                                    | 3.53                                         |
| 42          | 2.59                                    | 1.86                                    | 3.33                                         |
| 43          | 4.45                                    | 4.10                                    | 4.60                                         |
| 44          | 4.09                                    | 4.48                                    | 2.31                                         |
| 45          | 3.73                                    | 2.25                                    | 5.48                                         |
| 46          | 3.74                                    | 5.26                                    | 1.48                                         |
| 47          | 4.87                                    | 4.53                                    | 4.27                                         |
| 48          | 2.25                                    | 2.65                                    | 3.23                                         |
| 49          | 3.77                                    | 2.65                                    | 3.70                                         |
| 50          | 6.43                                    | 1.90                                    | 2.64                                         |
| 51          | 1.14                                    | 3.43                                    | 5.14                                         |
| 52          | 3.04                                    | 3.82                                    | 2.53                                         |
| 53          | 3.05                                    | 4.99                                    | 4.09                                         |
| 54          | 2.29                                    | 1.92                                    | 2.48                                         |
| 55          | 3.44                                    | 3.08                                    | 5.82                                         |
| 56          | 3.45                                    | 2.32                                    | 6.73                                         |
| 57          | 4.62                                    | 4.26                                    | 5.26                                         |
| 58          | 5.41                                    | 3.49                                    | 4.51                                         |
| 59          | 3.87                                    | 5.07                                    | 4.55                                         |
| 60          | 3.50                                    | 3.52                                    | 4.58                                         |
| 61          | 3.12                                    | 4.31                                    | 5.70                                         |
| 62          | 2.73                                    | 4.32                                    | 4.37                                         |
| 63          | 2.74                                    | 3.55                                    | 3.57                                         |
| 64          | 6.29                                    | 2.76                                    | 4.69                                         |
| 65          | 3.15                                    | 4.75                                    | 2.50                                         |
| 66          | 2.77                                    | 5.97                                    | 1.11                                         |
| 67          | 5.95                                    | 2.39                                    | 5.04                                         |
| 68          | 3.58                                    | 4.00                                    | 3.09                                         |
| 69          | 3.59                                    | 3.61                                    | 2.82                                         |
| 70          | 4.00                                    | 4.02                                    | 3.11                                         |
| 71          | 2.81                                    | 1.21                                    | 2.84                                         |
| 72          | 3.61                                    | 2.82                                    | 2.84                                         |

**Table S2:** Monthly hazard ratios for death after one-year relative to 90 days prior to one year by temporal cohort with interaction terms between cohort and time period

| Months Post One Year | Historical Cohort    | Pre-LAS Cohort       | Post-LAS Cohort             | Interaction Historical vs. Post-LAS | Interaction Pre-LAS vs. Post-LAS |
|----------------------|----------------------|----------------------|-----------------------------|-------------------------------------|----------------------------------|
| 1                    | 0.95<br>(0.66, 1.38) | 0.89<br>(0.61, 1.31) | <b>1.44</b><br>(1.12, 1.85) | 1.51<br>(0.97, 2.36)                | <b>1.61</b><br>(1.02, 2.55)      |
| 2                    | 1.25<br>(0.90, 1.75) | 1.28<br>(0.91, 1.78) | <b>1.44</b><br>(1.12, 1.87) | 1.15<br>(0.76, 1.76)                | 1.13<br>(0.74, 1.73)             |
| 3                    | 1.11<br>(0.78, 1.58) | 1.24<br>(0.88, 1.74) | 1.19<br>(0.90, 1.58)        | 1.07<br>(0.69, 1.68)                | 0.96<br>(0.62, 1.50)             |
| 4                    | 1.20<br>(0.85, 1.70) | 1.25<br>(0.89, 1.76) | 0.95<br>(0.70, 1.30)        | 0.79<br>(0.50, 1.25)                | 0.76<br>(0.48, 1.20)             |
| 5                    | 1.03<br>(0.71, 1.48) | 0.72<br>(0.47, 1.09) | 0.85<br>(0.62, 1.18)        | 0.83<br>(0.51, 1.35)                | 1.19<br>(0.70, 2.03)             |
| 6                    | 0.88<br>(0.59, 1.29) | 0.92<br>(0.62, 1.35) | 0.94<br>(0.69, 1.28)        | 1.07<br>(0.65, 1.77)                | 1.03<br>(0.62, 1.68)             |

Hazard ratio (95% CI)

Bold statistical significance at  $p < 0.05$

**Table S3:** Monthly hazard ratios for death or re-transplant relative to 90 days prior to one year by temporal cohort

| Months Post One Year | Historical Cohort    | Pre-LAS Cohort       | Post-LAS Cohort             |
|----------------------|----------------------|----------------------|-----------------------------|
| 1                    | 0.92<br>(0.65, 1.32) | 0.82<br>(0.56, 1.19) | <b>1.36</b><br>(1.06, 1.79) |
| 2                    | 1.10<br>(0.79, 1.54) | 1.15<br>(0.82, 1.60) | <b>1.37</b><br>(1.05, 1.79) |
| 3                    | 1.02<br>(0.72, 1.44) | 1.14<br>(0.81, 1.59) | 1.14<br>(0.85, 1.52)        |
| 4                    | 1.13<br>(0.81, 1.58) | 1.13<br>(0.80, 1.58) | 0.89<br>(0.62, 1.23)        |
| 5                    | 0.95<br>(0.66, 1.36) | 0.66<br>(0.43, 1.00) | 0.87<br>(0.63, 1.20)        |
| 6                    | 0.81<br>(0.55, 1.19) | 0.85<br>(0.58, 1.24) | 0.995<br>(0.70, 1.30)       |

Hazard ratio (95% CI)

Bold statistical significance at  $p < 0.05$

**Table S4:** Monthly hazard ratios for death relative to 90 days prior to one year using different temporal cohort

| <b>Months Post One Year</b> | <b>1995 – 2000</b>   | <b>2001 – 2003</b>   | <b>2004 – 2007</b>          | <b>2008 – 2011</b>          |
|-----------------------------|----------------------|----------------------|-----------------------------|-----------------------------|
| 1                           | 0.93<br>(0.65, 1.35) | 0.92<br>(0.59, 1.44) | 1.29<br>(0.93, 1.79)        | 1.43<br>(0.96, 2.06)        |
| 2                           | 1.13<br>(0.81, 1.58) | 1.27<br>(0.85, 1.89) | <b>1.39</b><br>(1.01, 1.92) | 1.40<br>(0.95, 2.07)        |
| 3                           | 1.04<br>(0.74, 1.48) | 1.21<br>(0.81, 1.82) | 0.99<br>(0.69, 1.43)        | <b>1.59</b><br>(1.08, 2.31) |
| 4                           | 1.16<br>(0.83, 1.62) | 1.08<br>(0.70, 1.65) | 1.00<br>(0.69, 1.44)        | 1.14<br>(0.74, 1.77)        |
| 5                           | 0.97<br>(0.67, 1.39) | 0.70<br>(0.42, 1.16) | 0.90<br>(0.62, 1.32)        | 0.85<br>(0.52, 1.39)        |
| 6                           | 0.82<br>(0.56, 1.21) | 0.86<br>(0.54, 1.38) | 1.02<br>(0.71, 1.47)        | 1.00<br>(0.63, 1.59)        |

Hazard ratio (95% CI)

Bold statistical significance at  $p < 0.05$

**Table S5:** Monthly hazard ratios for death relative to 90 days by candidate diagnosis

| Months Post<br>One Year | Candidate Diagnostic Group  |                              |                      |                             |
|-------------------------|-----------------------------|------------------------------|----------------------|-----------------------------|
|                         | A<br>(n = 2493)             | B<br>(n = 229)               | C<br>(n = 935)       | D<br>(n = 3778)             |
| 1                       | <b>1.74</b><br>(1.10, 2.75) | 5.05<br>(0.84, 30.22)        | 1.02<br>(0.48, 2.16) | 1.34<br>(0.92, 1.94)        |
| 2                       | 1.43<br>(0.87, 2.35)        | 1.86<br>(0.17, 20.47)        | 0.84<br>(0.37, 1.92) | <b>1.62</b><br>(1.14, 2.31) |
| 3                       | 1.40<br>(0.84, 2.32)        | 3.93<br>(0.55, 27.97)        | 1.12<br>(0.53, 2.37) | 1.07<br>(0.71, 1.62)        |
| 4                       | 0.88<br>(0.48, 1.62)        | <b>6.04</b><br>(1.01, 36.23) | 0.77<br>(0.32, 1.85) | 0.94<br>(0.61, 1.46)        |
| 5                       | 0.89<br>(0.49, 1.63)        | NA**                         | 0.90<br>(0.40, 2.07) | 0.95<br>(0.61, 1.48)        |
| 6                       | 1.39<br>(0.83, 2.32)        | <b>6.18</b><br>(1.03, 37.06) | 0.66<br>(0.25, 1.70) | 0.81<br>(0.51, 1.30)        |

Diagnosis groups are: A = Obstructive lung disease, B = Pulmonary vascular disease, C = Cystic fibrosis or immunodeficiency disorder, and D = Restrictive lung disease

Hazard ratio (95% CI)

Bold statistical significance at  $p < 0.05$
